# Supplementary material for: Metabolites of soil microorganisms modulate amyloid β production in Alzheimer’s neurons
Source: PubMed Central journal article supplement (PMC8891331; doi:10.1038/s41598-022-06513-z), 2022-03-02
Supplement: 41598_2022_6513_MOESM1_ESM.pdf [file 41598_2022_6513_MOESM1_ESM.pdf]

a

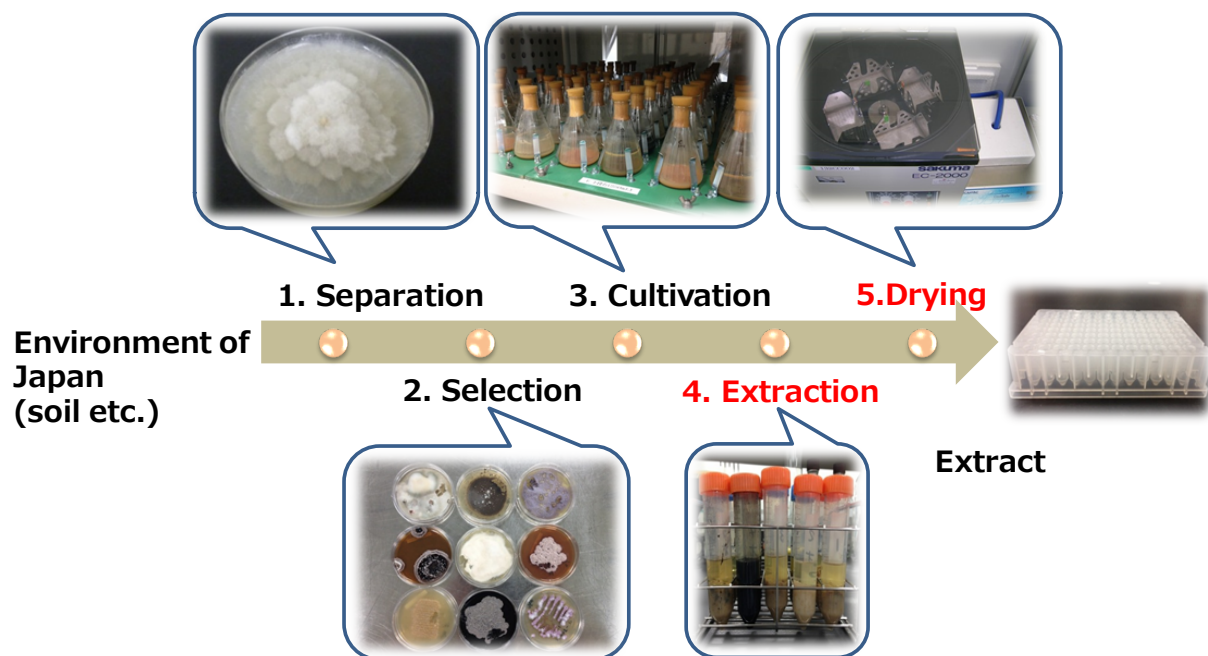

**Figure S1**

**Schema of isolation culture of microbiota**

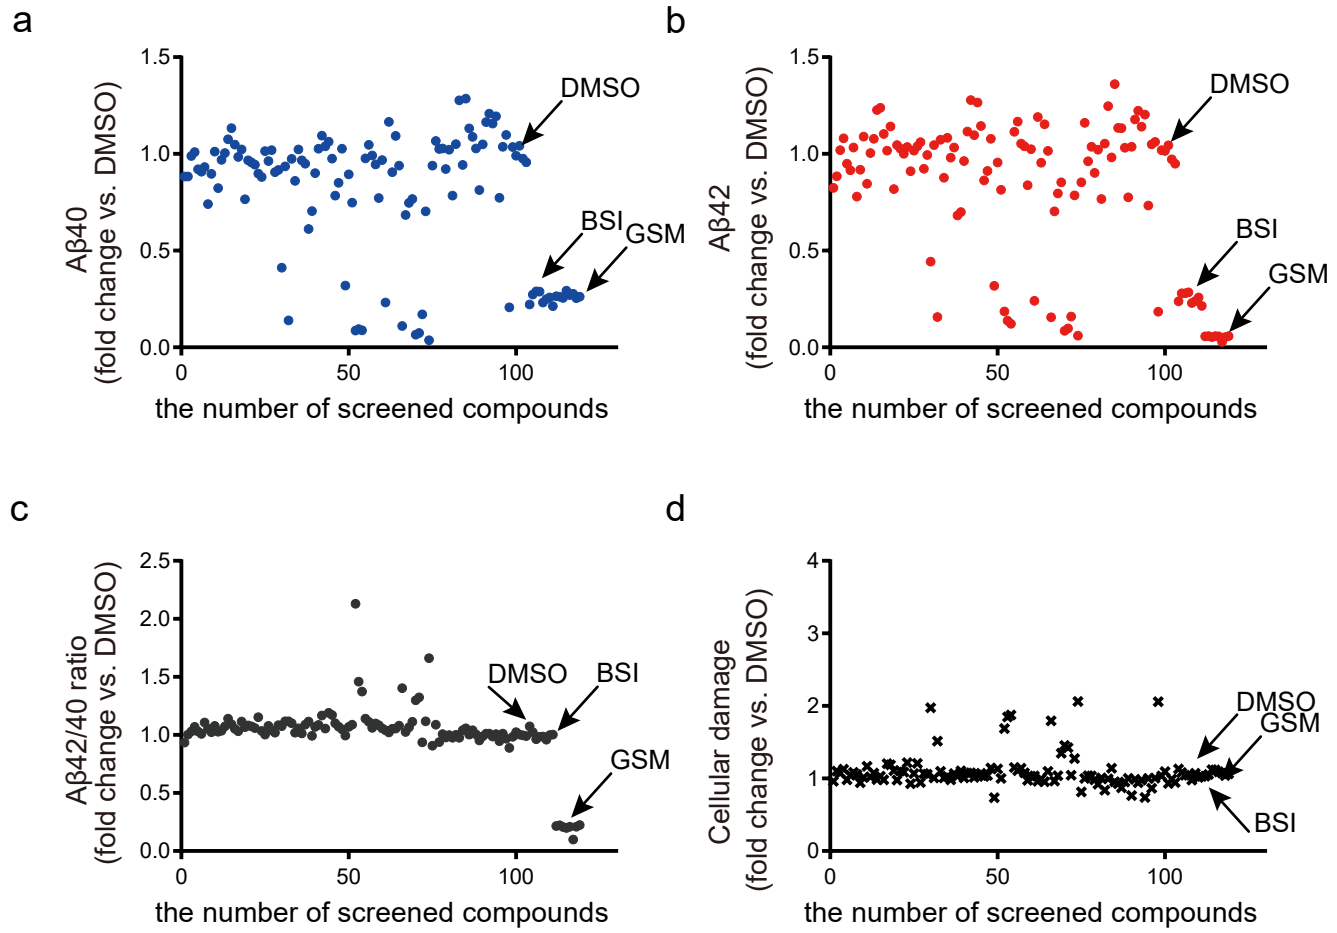

## Figure S2

### Primary screen results by using cortical neurons of familial Alzheimer's disease

Scatter plot graph of (a) A $\beta$ 40 (blue round), (b) A $\beta$ 42 (red round), (c) A $\beta$ 42/40 ratio (black round), and (d) cellular damage (black x-mark). Fold change compared with DMSO control was plotted after adding compounds at a concentration of 50 nM. DMSO: dimethyl sulfoxide (negative control); BSI:  $\beta$ -secretase inhibitor ( $\beta$ -secretase inhibitor IV, positive control for A $\beta$ 40); GSM:  $\gamma$ -secretase modulator (JNJ-40418677, positive control for A $\beta$ 42 and A $\beta$ 42/40 ratio).

# Figure S3

Kondo et al.

### leucanicidin

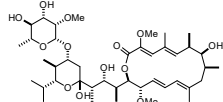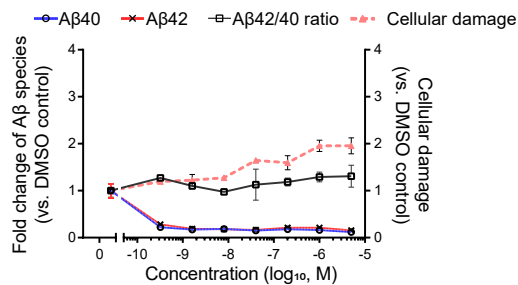

### bafilomycin A1

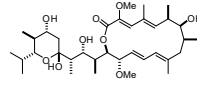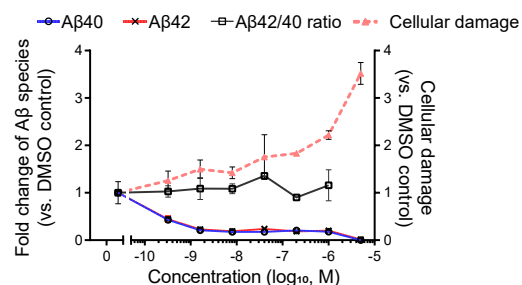

### roridin A

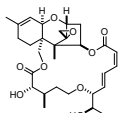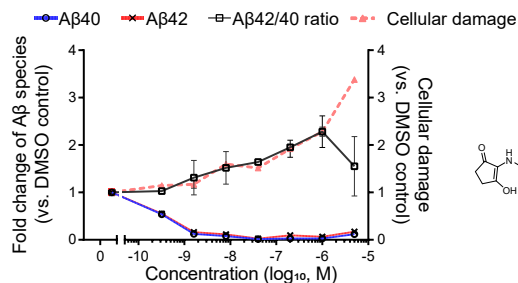

### bafilomycin B1

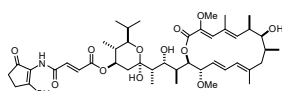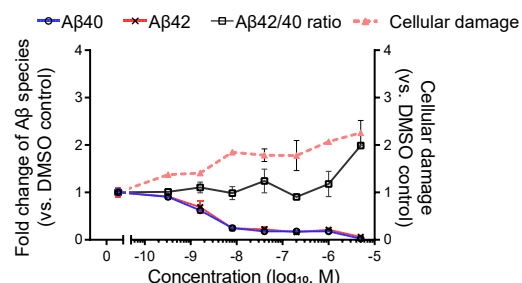

### kalafungin

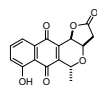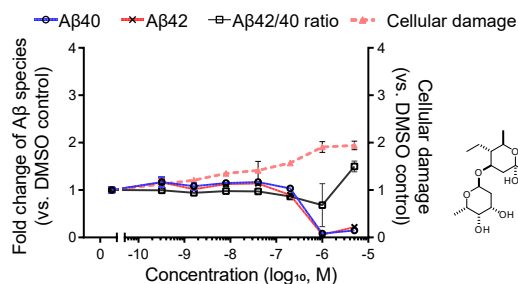

### efomycin A

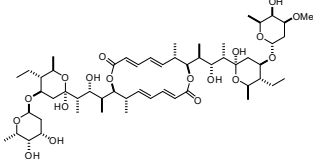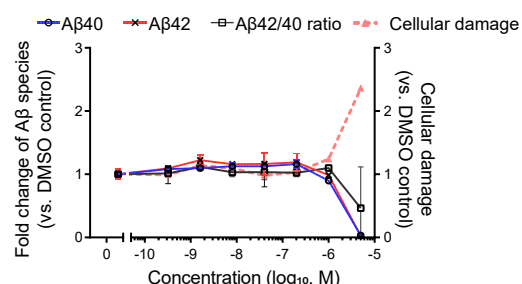

### elaiophyllin

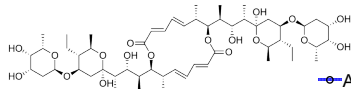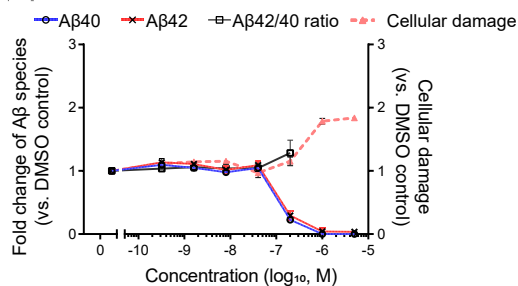

**Figure S3**

**Evaluation of dose-dependent effect of hit compounds from the screening assay by using iPSCs of a patient with sporadic AD.**

The effect on A $\beta$ 40 (blue line), A $\beta$ 42 (red line), A $\beta$ 42/40 ratio (black line), and cellular damage (dash line) was shown for each compound. Data represent mean  $\pm$  SD (n = 3 per clone).

# Figure S4

Kondo et al.

Verrucarin A

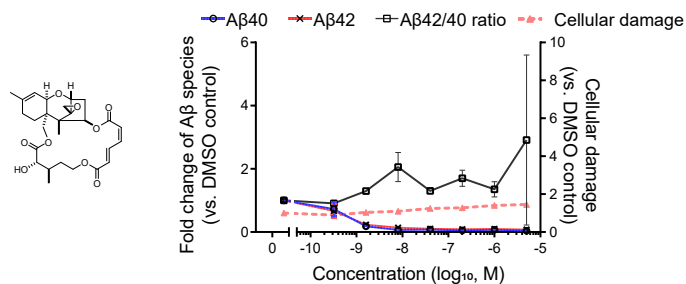

Mer-A2026A

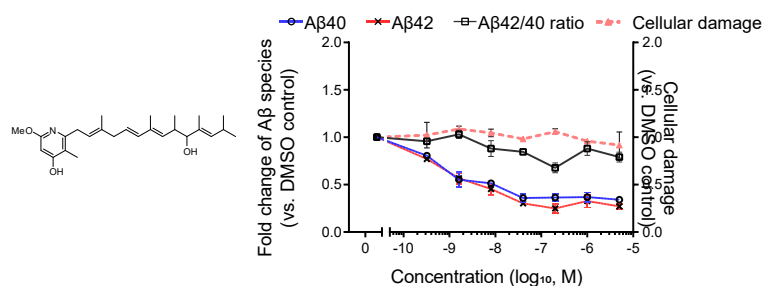

leucanicidin

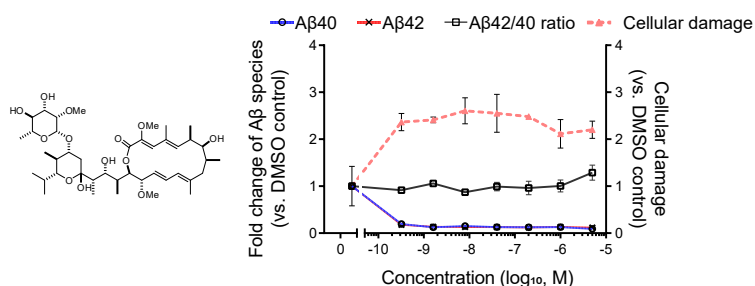

bafilomycin A1

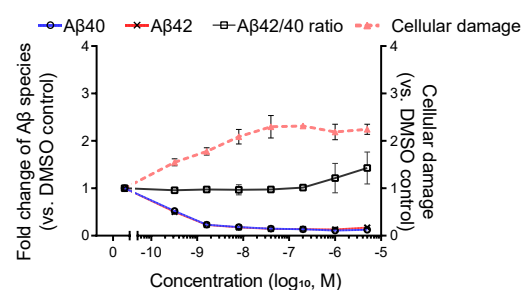

roridin A

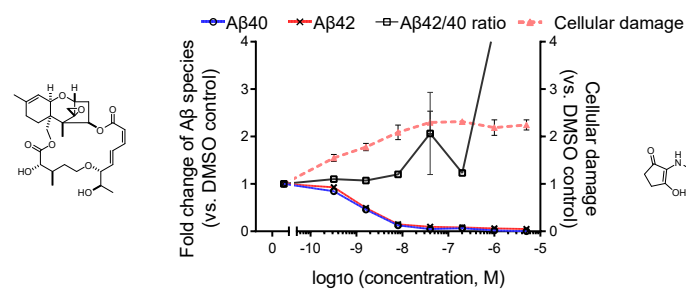

bafilomycin B1

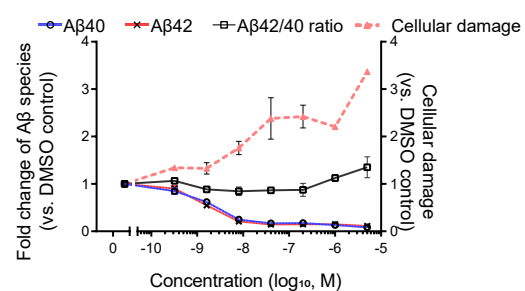

kalafungin

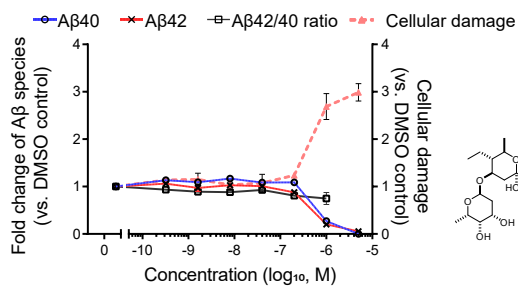

efomycin A

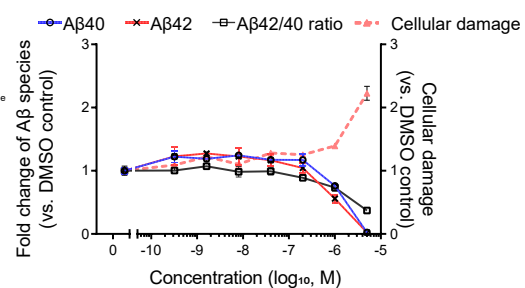

elaiophyllin

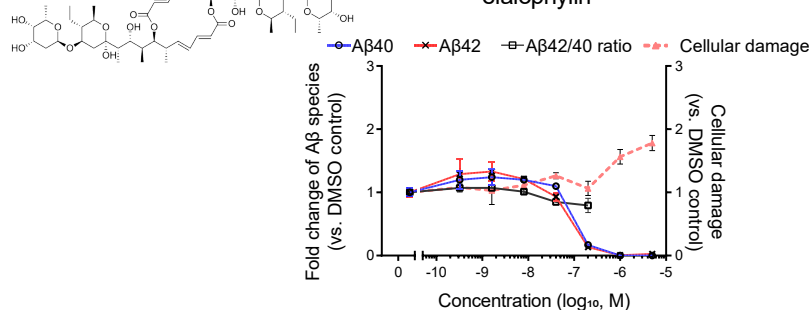

**Figure S4**

**Evaluation of dose-dependent effect of hit compounds from the screening assay by using iPSCs of a patient with familial AD bearing *PSEN1* G384A mutation.**

The effect on A $\beta$ 40 (blue line), A $\beta$ 42 (red line), A $\beta$ 42/40 ratio (black line), and cellular damage (dash line) was shown for each compound. Data represent mean  $\pm$  SD (n = 3 per clone).





## Figure S5

**Evaluation of dose-dependent effect of Verrucarin A and Mer-A2026A by using iPSCs of healthy controls (Healthy control 1 and Healthy control 2), another patient of sporadic AD (SAD patient 2), and another patient of familial AD bearing *APP* V717L mutation (FAD patient 2)**

The effect on A $\beta$ 40 (blue line), A $\beta$ 42 (red line), A $\beta$ 42/40 ratio (black line), and cellular damage (dash line) was shown for each compound. Data represent mean  $\pm$  SD (n = 3 per clone).

## Supplementary table S1: Results of the first screening based on neurons with SAD

| No. | Compound                          | A $\beta$ 40 | A $\beta$ 42 | A $\beta$ 42/40 ratio | toxicity     | Hit criteria |
|-----|-----------------------------------|--------------|--------------|-----------------------|--------------|--------------|
| 1   | desmycosin                        | 0.919        | 0.751        | 0.818                 | 0.886        | -            |
| 2   | izenamicin B3                     | 0.907        | 0.913        | 1.007                 | 0.980        | -            |
| 3   | 23-O-demycinosyltylosin           | 0.860        | 0.822        | 0.956                 | 0.995        | -            |
| 4   | tylosin                           | 0.829        | 0.735        | 0.887                 | 1.084        | -            |
| 5   | 5-O-mycaminosyltylonolide         | 0.956        | 0.870        | 0.910                 | 1.003        | -            |
| 6   | demethylmacrocicin                | 0.943        | 0.831        | 0.881                 | 1.105        | -            |
| 7   | macrocicin                        | 0.835        | 0.793        | 0.949                 | 0.970        | -            |
| 8   | carbomycin B                      | 0.708        | 0.594        | 0.839                 | 1.041        | -            |
| 9   | 3-O-acetyltylosin                 | 0.885        | 0.871        | 0.984                 | 0.941        | -            |
| 10  | cytochalasin A                    | 0.929        | 0.903        | 0.972                 | 1.137        | -            |
| 11  | cytochalasin B                    | 0.573        | 0.573        | 1.000                 | 1.216        | -            |
| 12  | chaetoglobosin A                  | 0.655        | 0.563        | 0.859                 | 1.120        | -            |
| 13  | chaetoglobosin B                  | 0.848        | 0.807        | 0.952                 | 1.107        | -            |
| 14  | chaetoglobosin C                  | 0.949        | 0.933        | 0.983                 | 1.170        | -            |
| 15  | chaetoglobosin D                  | 0.507        | 0.455        | 0.897                 | 1.401        | -            |
| 16  | chaetoglobosin E                  | 0.863        | 0.792        | 0.917                 | 1.265        | -            |
| 17  | chaetoglobosin F                  | 0.863        | 0.797        | 0.924                 | 1.296        | -            |
| 18  | chaetoglobosin J                  | 0.864        | 0.753        | 0.871                 | 1.228        | -            |
| 19  | polyoxin D                        | 0.706        | 0.717        | 1.015                 | 1.060        | -            |
| 20  | polyoxin L                        | 0.879        | 0.885        | 1.007                 | 0.812        | -            |
| 21  | guanidylfungin A                  | 0.928        | 1.022        | 1.101                 | 1.055        | -            |
| 22  | Mer-WF5027                        | 0.988        | 0.766        | 0.776                 | 1.158        | -            |
| 23  | wortmannin                        | 0.868        | 0.957        | 1.102                 | 1.349        | -            |
| 24  | toyocamycin                       | <b>0.234</b> | <b>0.226</b> | 0.965                 | <b>1.570</b> | -            |
| 25  | amastatin                         | 0.952        | 1.006        | 1.057                 | 1.040        | -            |
| 26  | griseolutein B                    | 0.539        | 0.516        | 0.957                 | <b>1.738</b> | -            |
| 27  | relomycin                         | 0.961        | 1.036        | 1.077                 | 1.082        | -            |
| 28  | calbistrin A                      | 0.845        | 0.825        | 0.977                 | 1.112        | -            |
| 29  | neoviridogrisein II               | 0.879        | 0.901        | 1.025                 | 1.198        | -            |
| 30  | chrysomycin A                     | <b>0.115</b> | <b>0.127</b> | 1.100                 | <b>2.103</b> | -            |
| 31  | gancidin W                        | 0.788        | 0.815        | 1.035                 | 0.942        | -            |
| 32  | salinomycin                       | <b>0.066</b> | <b>0.067</b> | 1.022                 | <b>1.626</b> | -            |
| 33  | leupeptin                         | 0.894        | 0.946        | 1.058                 | 1.068        | -            |
| 34  | deferoxamine mesylate             | 0.801        | 0.756        | 0.944                 | 0.896        | -            |
| 35  | pepstatin A                       | 1.097        | 1.051        | 0.958                 | 1.113        | -            |
| 36  | chymostatin                       | 1.015        | 1.057        | 1.041                 | 1.071        | -            |
| 37  | neospergilliacid                  | 0.952        | 0.933        | 0.980                 | 1.152        | -            |
| 38  | brefeldin A                       | <b>0.056</b> | <b>0.069</b> | 1.225                 | <b>2.398</b> | -            |
| 39  | dehydrorabelomycin                | 0.433        | 0.438        | 1.011                 | 1.190        | -            |
| 40  | tenuazonic acid                   | 0.797        | 0.741        | 0.930                 | 0.783        | -            |
| 41  | funiculosin                       | <b>0.234</b> | <b>0.212</b> | 0.905                 | <b>1.871</b> | -            |
| 42  | leucomycin U                      | 0.959        | 0.968        | 1.009                 | 0.887        | -            |
| 43  | 3-O-acetyl-4"-O-isovaleryltylosin | 0.988        | 0.988        | 1.001                 | 1.091        | -            |
| 44  | leucomycin A1                     | 1.024        | 1.117        | 1.092                 | 0.973        | -            |
| 45  | angolamycin                       | 0.958        | 1.002        | 1.046                 | 1.095        | -            |
| 46  | Mer-NF5003 E                      | 0.633        | 0.628        | 0.993                 | 1.009        | -            |
| 47  | stachybotrydial                   | 0.835        | 0.776        | 0.930                 | 0.921        | -            |
| 48  | Mer-NF8054 A                      | 1.000        | 1.000        | 1.000                 | 1.036        | -            |
| 49  | Mer-A2026 B                       | <b>0.211</b> | <b>0.195</b> | 0.920                 | <b>1.579</b> | -            |
| 50  | propioxatin A                     | 0.969        | 0.974        | 1.005                 | 1.189        | -            |
| 51  | cytomycin                         | 0.629        | 0.610        | 0.970                 | 1.023        | -            |
| 52  | bafilomycin A1                    | <b>0.074</b> | <b>0.123</b> | <b>1.677</b>          | <b>1.531</b> | <b>1</b>     |
| 53  | leucanicidin                      | <b>0.074</b> | <b>0.137</b> | <b>1.866</b>          | <b>1.709</b> | <b>1</b>     |
| 54  | bafilomycin B1                    | <b>0.079</b> | <b>0.120</b> | <b>1.518</b>          | <b>2.071</b> | <b>1</b>     |
| 55  | bafilomycin D                     | 0.496        | 0.442        | 0.891                 | 1.014        | -            |
| 56  | phenylacetic acid                 | 0.955        | 0.929        | 0.973                 | 1.111        | -            |
| 57  | eupenifeldin                      | 0.869        | 0.800        | 0.920                 | 1.052        | -            |
| 58  | $\alpha$ -MAPI                    | 1.087        | 1.042        | 0.958                 | 1.010        | -            |
| 59  | papulacandin E                    | 0.646        | 0.643        | 0.996                 | 1.038        | -            |
| 60  | bacilycin                         | 0.785        | 0.781        | 0.995                 | 0.964        | -            |
| 61  | antibiotic SF 2487                | <b>0.043</b> | <b>0.036</b> | 0.843                 | <b>1.592</b> | -            |
| 62  | $\beta$ -MAPI                     | 0.982        | 1.001        | 1.019                 | 1.039        | -            |
| 63  | FK 506                            | 0.889        | 1.040        | 1.170                 | 0.904        | -            |
| 64  | hikizimycin                       | 0.954        | 0.986        | 1.034                 | 1.080        | -            |
| 65  | mithramycin                       | <b>0.134</b> | <b>0.113</b> | 0.842                 | <b>2.053</b> | -            |
| 66  | concanamycin A                    | <b>0.067</b> | <b>0.083</b> | 1.246                 | <b>1.991</b> | -            |
| 67  | bredinin                          | 0.464        | 0.484        | 1.044                 | 0.881        | -            |
| 68  | fungichromin                      | 0.723        | 0.713        | 0.986                 | 0.950        | -            |

|    |                         |              |              |              |              |          |
|----|-------------------------|--------------|--------------|--------------|--------------|----------|
| 69 | zincophorin             | 0.540        | 0.544        | 1.008        | 1.230        | -        |
| 70 | verrucarin A            | <b>0.062</b> | <b>0.070</b> | 1.129        | 1.329        | <b>2</b> |
| 71 | roridin A               | <b>0.058</b> | <b>0.094</b> | <b>1.620</b> | 1.301        | <b>1</b> |
| 72 | Mer-A2026 A             | <b>0.150</b> | <b>0.157</b> | 1.052        | 0.953        | <b>2</b> |
| 73 | efomycin A              | <b>0.209</b> | <b>0.187</b> | 0.893        | 1.165        | <b>2</b> |
| 74 | boromycin               | <b>0.018</b> | <b>0.018</b> | 1.033        | <b>1.884</b> | -        |
| 75 | pyridoxatin             | 0.997        | 0.889        | 0.892        | 0.788        | -        |
| 76 | complestatin            | 1.136        | 1.156        | 1.018        | 0.926        | -        |
| 77 | kalafungin              | <b>0.076</b> | <b>0.043</b> | <b>0.564</b> | <b>3.036</b> | <b>1</b> |
| 78 | blasticidin S           | 0.683        | 0.597        | 0.874        | 1.100        | -        |
| 79 | gliotoxin G             | 0.671        | 0.574        | 0.856        | 1.010        | -        |
| 80 | elaiophylin             | <b>0.010</b> | <b>0.011</b> | 1.141        | 1.119        | <b>2</b> |
| 81 | efomycin G              | <b>0.029</b> | <b>0.000</b> | <b>0.000</b> | <b>2.423</b> | -        |
| 82 | medermycin              | 1.019        | 1.087        | 1.067        | 0.756        | -        |
| 83 | oosporein               | 0.827        | 0.847        | 1.025        | 1.057        | -        |
| 84 | staurosporine           | 0.316        | 0.351        | 1.112        | <b>2.045</b> | -        |
| 85 | citrinin                | 1.033        | 1.016        | 0.983        | 0.960        | -        |
| 86 | spiculisporic acid      | 0.972        | 0.994        | 1.023        | 0.902        | -        |
| 87 | calbistrin B            | 0.607        | 0.525        | 0.864        | 0.970        | -        |
| 88 | 5'-deoxytoyocamycin     | 0.943        | 0.930        | 0.986        | 0.896        | -        |
| 89 | aspergillin             | 0.882        | 0.847        | 0.960        | 0.928        | -        |
| 90 | chrysomycin B           | 0.434        | 0.406        | 0.935        | <b>1.955</b> | -        |
| 91 | cephamycin C            | 1.004        | 0.990        | 0.987        | 1.025        | -        |
| 92 | gliotoxin               | 0.964        | 0.953        | 0.989        | 0.961        | -        |
| 93 | streptothricin F        | 1.063        | 1.015        | 0.955        | 0.991        | -        |
| 94 | penicillic acid         | 1.034        | 0.981        | 0.949        | 0.901        | -        |
| 95 | streptothricin A        | 0.889        | 0.850        | 0.956        | 0.971        | -        |
| 96 | thiopeptin A1a          | 0.595        | 0.590        | 0.992        | 0.887        | -        |
| 97 | novobiocin              | 0.995        | 1.042        | 1.047        | 0.833        | -        |
| 98 | actinomycin D           | <b>0.129</b> | <b>0.132</b> | 1.023        | <b>2.310</b> | -        |
| NA | DMSO (negative control) | 1.007        | 1.035        | 0.988        | 1.045        | -        |
| NA | DMSO (negative control) | 1.006        | 1.013        | 1.007        | 1.029        | -        |
| NA | DMSO (negative control) | 1.001        | 1.004        | 1.003        | 0.982        | -        |
| NA | DMSO (negative control) | 0.952        | 0.928        | 0.975        | 0.948        | -        |
| NA | DMSO (negative control) | 0.994        | 1.020        | 1.026        | 0.997        | -        |
| NA | BACE inhibitor IV (BSI) | <b>0.205</b> | <b>0.210</b> | 1.023        | 0.979        | -        |
| NA | BACE inhibitor IV (BSI) | <b>0.238</b> | <b>0.219</b> | 0.921        | 0.969        | -        |
| NA | BACE inhibitor IV (BSI) | <b>0.250</b> | <b>0.248</b> | 0.992        | 0.985        | -        |
| NA | BACE inhibitor IV (BSI) | <b>0.228</b> | <b>0.227</b> | 0.996        | 0.995        | -        |
| NA | BACE inhibitor IV (BSI) | <b>0.279</b> | <b>0.248</b> | 0.891        | 0.963        | -        |
| NA | BACE inhibitor IV (BSI) | <b>0.206</b> | <b>0.171</b> | 0.833        | 0.982        | -        |
| NA | BACE inhibitor IV (BSI) | <b>0.226</b> | <b>0.201</b> | 0.893        | 0.936        | -        |
| NA | BACE inhibitor IV (BSI) | <b>0.214</b> | <b>0.201</b> | 0.939        | 0.990        | -        |
| NA | JNJ-40418677 (GSM)      | <b>0.285</b> | <b>0.059</b> | <b>0.209</b> | 1.007        | -        |
| NA | JNJ-40418677 (GSM)      | <b>0.276</b> | <b>0.056</b> | <b>0.201</b> | 1.000        | -        |
| NA | JNJ-40418677 (GSM)      | <b>0.273</b> | <b>0.059</b> | <b>0.218</b> | 1.012        | -        |
| NA | JNJ-40418677 (GSM)      | <b>0.265</b> | <b>0.057</b> | <b>0.215</b> | 0.989        | -        |
| NA | JNJ-40418677 (GSM)      | <b>0.282</b> | <b>0.059</b> | <b>0.208</b> | 0.960        | -        |
| NA | JNJ-40418677 (GSM)      | <b>0.273</b> | <b>0.061</b> | <b>0.222</b> | 0.993        | -        |
| NA | JNJ-40418677 (GSM)      | <b>0.280</b> | <b>0.064</b> | <b>0.228</b> | 0.975        | -        |
| NA | JNJ-40418677 (GSM)      | <b>0.260</b> | <b>0.058</b> | <b>0.222</b> | 0.963        | -        |
